# Supplementary material for: Association of Subcutaneous or Intravenous Administration of Casirivimab and Imdevimab Monoclonal Antibodies With Clinical Outcomes in Adults With COVID-19
Source: PubMed Central journal article supplement (PMC9006104; doi:10.1001/jamanetworkopen.2022.6920), 2022-04-12

## Supplementary Online Content

McCreary EK, Bariola JR, Wadas RJ, et al. Association of subcutaneous or intravenous administration of casirivimab and imdevimab monoclonal antibodies with clinical outcomes in adults with COVID-19. *JAMA Netw Open*. 2022;5(4):e226920. doi:10.1001/jamanetworkopen.2022.6920

**eTable 1.** Monoclonal Antibody Subcutaneous Orders and Reaction Management

**eTable 2.** ICD-9 and ICD-10 Codes Used for Diagnoses and Procedures

**eTable 3.** Primary and Secondary Outcomes in an Unmatched Cohort of Patients Receiving Subcutaneous Monoclonal Antibody Treatment and an At-Risk Population of Patients Not Receiving Monoclonal Antibody Treatment

**eTable 4.** Comparison of Characteristics in Subcutaneous mAb Treated Group and Nontreated Control Group

**eTable 5.** 28-Day Hospitalization Outcomes by Route of mAb Administration

**eFigure 1.** Distribution of Propensity Scores (X 100) Before and After Matching of Treated and Not Treated Patients

**eFigure 2.** Plot of Cumulative Event Rates of Hospitalization/Death by Day of Follow-up (X-Axis) for Matched Treated (Solid Line) and Not Treated (Dashed Line) Patients

This supplementary material has been provided by the authors to give readers additional information about their work.

**eTable 1. Monoclonal Antibody Subcutaneous Orders and Reaction Management**

| Injection Orders                                                                                                              | Reaction Management                                                                                                                                                                                                                                                                                                                                                                                                                                                                                                                                                                                                                                     | Extravasation Management                                                                                                                                                                                                                                                                                                                                                                                                                                                             |
|-------------------------------------------------------------------------------------------------------------------------------|---------------------------------------------------------------------------------------------------------------------------------------------------------------------------------------------------------------------------------------------------------------------------------------------------------------------------------------------------------------------------------------------------------------------------------------------------------------------------------------------------------------------------------------------------------------------------------------------------------------------------------------------------------|--------------------------------------------------------------------------------------------------------------------------------------------------------------------------------------------------------------------------------------------------------------------------------------------------------------------------------------------------------------------------------------------------------------------------------------------------------------------------------------|
| Inject four subcutaneous injections.                                                                                          | For all reactions: <ul style="list-style-type: none"> <li>- Obtain vital signs and O2 saturation every 10 minutes.</li> <li>- Refer to orders below for symptomatic management.</li> <li>- Complete RiskMaster Event Report.</li> </ul>                                                                                                                                                                                                                                                                                                                                                                                                                 | Do not administer remainder of injections. <ul style="list-style-type: none"> <li>- Minor extravasation of non-vesicant/non-irritant solutions do not require additional treatment.</li> <li>- Cold compress may be applied if desired.</li> </ul>                                                                                                                                                                                                                                   |
| Monoclonal antibody orders: casirivimab 600mg – imdevimab 600mg, subcutaneously once (administered as four, 300mg injections) | For fever, chills, pain, or headache: <ul style="list-style-type: none"> <li>- acetaminophen 1000mg PO once (18 years or older); 650mg PO once (12-17 years)</li> </ul>                                                                                                                                                                                                                                                                                                                                                                                                                                                                                 | Closely monitor the patient for 1 hour. Do not administer remaining injections. <ul style="list-style-type: none"> <li>- The patient’s physician (or Advanced Practice Provider, or IV therapy nurse) should be contacted immediately to evaluate the patient if any of the following severe extravasation symptoms occur: i. The patient is experiencing pain ii. The skin around the area is discolored iii. The area is inflamed and/or larger than size of a quarter.</li> </ul> |
| Check vitals at baseline and 30 minutes after injection.                                                                      | For itching, rash, hives, or flushing: <ul style="list-style-type: none"> <li>- diphenhydramine 25 mg IV or PO once</li> <li>- famotidine 20 mg IV or PO once</li> <li>- Continuing injections is not recommended</li> </ul>                                                                                                                                                                                                                                                                                                                                                                                                                            | Complete RiskMaster Event, report to FDA Med Watch.                                                                                                                                                                                                                                                                                                                                                                                                                                  |
| Observe patient for 30 minutes post-injection. Check vitals at end of observation period, prior to discharge.                 | For MILD shortness of breath, or MILD chest tightness without wheezing or other symptoms CONTACT PHYSICIAN: <ul style="list-style-type: none"> <li>- Do not administer remainder of injections</li> <li>- Provide supplemental oxygen via nasal cannula to keep O2 saturation &gt;94%</li> <li>- Albuterol metered dose inhaler 2 puffs INH once</li> <li>- Methylprednisolone 60mg IM once (18 years or older); 2mg/kg IVP once (12-17 years, max dose 125mg)</li> </ul>                                                                                                                                                                               | Discharge the patient at the end of the 1-hour monitoring period.                                                                                                                                                                                                                                                                                                                                                                                                                    |
| Provide post-administration instructions if adverse reaction or worsening symptoms occur after discharge                      | For moderate-to-severe respiratory symptoms, stridor, severe bronchospasm, sensation of throat closure or choking, tongue/lip swelling, new onset wheezing, SBP: <ul style="list-style-type: none"> <li>- Do not administer remainder of injections               <ul style="list-style-type: none"> <li>o Epinephrine 0.3 mg IM (of 1mg/mL solution) once into anterolateral thigh</li> </ul> </li> <li>- Place patient into recumbent position with lower extremities elevated</li> <li>- If able to start IV, administer Lactated Ringers 500 mL IV bolus once **FLUSH LINE WITH NS FLUSHES ONLY**</li> <li>- Call “Condition” / Call 911</li> </ul> |                                                                                                                                                                                                                                                                                                                                                                                                                                                                                      |

**eTable 2. ICD-9 and ICD-10 Codes Used for Diagnoses and Procedures**

| Diabetes |          |          |          |          |          |          |
|----------|----------|----------|----------|----------|----------|----------|
| 250.91   | 250.93   | E11.59   | E13.3399 | E11.3392 | E10.49   | E13.3523 |
| 250.23   | 250.22   | E11.8    | E11.3299 | E10.36   | E11.621  | E10.649  |
| 250.10   | 250.40   | E10.37X9 | E11.3312 | E10.8    | E13.00   | E13.37X2 |
| E13.620  | 250.63   | E13.43   | E10.3492 | E13.3212 | E10.9    | E13.3551 |
| E13.9    | 250.71   | E13.3213 | E10.3499 | E13.3522 | E10.65   | E11.3591 |
| E13.3599 | 250.70   | E13.3593 | 250.72   | E11.641  | E11.3511 | E10.3512 |
| E11.3291 | E13.3393 | E10.3212 | 250.83   | E10.21   | E10.622  | E13.69   |
| E11.3541 | E11.39   | E10.3549 | E10.43   | E11.51   | E11.00   | E10.37X1 |
| E10.3493 | E10.3543 | E13.311  | E13.11   | E13.01   | E11.3413 | E13.3531 |
| E10.51   | E10.3591 | E13.3313 | E10.29   | E11.11   | E10.3299 | E13.3592 |
| E13.3292 | E11.42   | E11.3543 | E10.3312 | E11.3533 | E10.3411 | E13.49   |
| E13.3419 | E10.628  | E10.3393 | E13.3542 | E11.3553 | E13.3493 | E11.3219 |
| E13.59   | E11.10   | E10.3519 | E10.39   | E10.311  | E13.3532 | E10.3313 |
| E10.630  | E11.3491 | 250.90   | E11.628  | E10.3513 | E13.3549 | E11.3419 |
| E11.37X2 | E10.3399 | 250.20   | Z96.41   | E10.41   | E13.3559 | E11.630  |
| E10.3521 | E13.36   | 250.80   | E13.3312 | E11.43   | E11.3393 | E13.3491 |
| E13.3552 | E11.65   | 250.50   | E13.3392 | E13.638  | E10.3599 | E13.3519 |
| E13.40   | E10.3532 | 250.61   | E11.22   | E10.3531 | E11.649  | E13.3539 |
| E13.52   | E13.41   | 250.62   | E11.29   | E10.3592 | E11.3559 | E11.37X3 |
| E13.622  | E11.3213 | E13.630  | E11.3212 | E13.3512 | E10.3391 | E10.3523 |
| E11.3311 | E11.3313 | E13.3219 | E11.3552 | E13.42   | E10.52   | E10.3529 |
| E11.3512 | E13.641  | E10.10   | E11.49   | E13.44   | E11.620  | E10.42   |
| E10.3511 | E10.37X2 | E11.21   | E13.21   | E11.3399 | E10.3293 | E13.65   |
| E13.3411 | E11.37X9 | E11.3211 | E11.01   | E11.3492 | 250.41   | E13.610  |
| E11.3513 | E10.3319 | E11.3593 | E10.641  | E11.3532 | 250.12   | E11.3493 |
| E10.3219 | E11.69   | E10.319  | E13.621  | E11.3549 | 250.21   | E11.622  |
| E11.41   | E11.3293 | E13.3492 | E11.3319 | E10.3292 | 250.02   | E13.3391 |
| E13.3319 | E13.3293 | E13.649  | E11.3519 | E10.3553 | 250.13   | E10.638  |
| E10.11   | E11.3542 | E11.9    | E11.3522 | E13.22   | E13.3299 | E13.3541 |
| E10.3551 | E13.3291 | E10.3593 | E10.3491 | E13.29   | E13.3543 | E11.3521 |
| E11.618  | E13.3591 | E10.621  | E10.618  | E11.3551 | E13.37X9 | E11.3523 |
| E11.3529 | E10.3291 | E13.3533 | E13.3529 | E13.3413 | E11.3412 | E10.3522 |
| E13.3211 | E10.3392 | E13.628  | E13.8    | E13.3521 | E10.3419 | E13.3511 |
| E13.3311 | E11.319  | E10.22   | E10.44   | E13.618  | E10.40   | E13.37X1 |
| E13.3553 | E11.3391 | E11.36   | E13.37X3 | E11.3411 | 250.60   | E10.59   |
| E11.311  | E10.3559 | E10.3211 | E10.3541 | E10.610  | 250.92   | E13.10   |
| E11.37X1 | E13.51   | E10.3539 | E10.620  | E11.52   | 250.81   | V45.85   |
| E11.44   | E11.3499 | E10.37X3 | 250.03   | E11.3292 | E13.39   | E11.3531 |
| 250.32   | E10.3412 | E11.638  | 250.00   | E11.40   | E11.3599 | E10.69   |
| 250.52   | E10.3533 | 250.73   | 250.82   | E10.3552 | E10.3213 | E13.3412 |
| 250.53   | E11.610  | 250.11   | 250.01   | E11.3592 | E13.319  | E11.3539 |

|                                       |          |         |          |          |         |          |
|---------------------------------------|----------|---------|----------|----------|---------|----------|
| 250.42                                | 250.33   | 250.43  | 250.30   | E10.3311 | 250.51  | E10.3413 |
| E13.3499                              | E10.3542 | 250.31  | 250.31   | ..       | ..      | ..       |
|                                       |          |         |          |          |         |          |
| Obstructive Sleep Apnea               |          |         |          |          |         |          |
| 327.29                                | G47.33   | G47.31  | 327.20   | 786.03   | G47.39  | 327.23   |
| G47.37                                | G47.30   | R06.81  | 327.27   | 327.21   | 780.51  | 780.53   |
| 780.57                                | ..       | ..      | ..       | ..       | ..      | ..       |
|                                       |          |         |          |          |         |          |
| Dyspnea                               |          |         |          |          |         |          |
| 786.09                                | R06.02   | R06.00  | 786.05   | R06.09   | ..      | ..       |
|                                       |          |         |          |          |         |          |
| Asthma                                |          |         |          |          |         |          |
| 493.10                                | Z91.849  | O9A.212 | J44.1    | O9A.113  | Z57.1   | Z91.843  |
| 493.11                                | Z57.7    | J20.1   | T50.995A | Z57.5    | Z57.2   | J45.22   |
| 648.93                                | 466.0    | J45.32  | O99.283  | O9A.312  | 493.21  | 799.02   |
| J44.9                                 | 493.12   | O9A.211 | O9A.313  | O9A.411  | 491.9   | 465.9    |
| J45.902                               | 493.20   | Z77.22  | O99.619  | 493.01   | J45.40  | 493.82   |
| O99.519                               | 648.90   | O99.820 | Z56.4    | 493.92   | Z56.5   | 493.91   |
| O99.281                               | O9A.319  | J45.990 | O25.11   | R09.02   | Z56.6   | J45.31   |
| O99.712                               | J45.41   | O25.10  | J42      | Z91.82   | J20.8   | O99.612  |
| O9A.112                               | O9A.412  | J06.9   | O25.12   | J20.4    | Z77.122 | J45.30   |
| O99.713                               | O99.613  | J20.2   | Z91.841  | O9A.413  | J45.909 | O99.611  |
| Z91.89                                | Z56.9    | O25.13  | 493.22   | O9A.512  | Z57.6   | Z77.21   |
| J45.991                               | O99.512  | J45.52  | 995.27   | O9A.213  | J20.5   | Z57.0    |
| Z56.81                                | Z77.128  | 493.00  | V15.89   | Z57.9    | O9A.219 | J20.9    |
| J45.21                                | J20.7    | V62.1   | Z57.39   | O9A.511  | Z77.112 | O99.511  |
| O99.280                               | Z91.842  | 493.90  | O99.719  | Z92.89   | Z77.9   | Z77.111  |
| O99.513                               | Z56.3    | J45.20  | Z92.84   | J20.3    | O99.282 | O9A.519  |
| Z77.118                               | J20.0    | O9A.119 | J45.50   | Z57.31   | O9A.111 | J33.9    |
| J45.51                                | 471.9    | Z77.123 | J45.998  | J45.42   | Z56.2   | Z57.8    |
| J45.901                               | 493.81   | Z56.89  | Z77.110  | O9A.419  | Z57.4   | 120.6    |
| O9A.513                               | 493.02   | O99.711 | J44.0    | O9A.311  | ..      | ..       |
|                                       |          |         |          |          |         |          |
| Pulmonary Hypertension                |          |         |          |          |         |          |
| I27.82                                | I27.0    | I27.20  | 416.0    | I27.23   | I27.22  | I27.89   |
| I27.29                                | 416.2    | I27.24  | 416.8    | I27.21   | ..      | ..       |
|                                       |          |         |          |          |         |          |
| Hypertension                          |          |         |          |          |         |          |
| 401.9                                 | 593.82   | I15.1   | 405.09   | I15.9    | 405.99  | 593.89   |
| 401.1                                 | 405.19   | I15.2   | 401.0    | N28.89   | 405.11  | I15.0    |
| I16.0                                 | 405.01   | I16.1   | I15.8    | 405.91   | I10     | I16.9    |
|                                       |          |         |          |          |         |          |
| Chronic Obstructive Pulmonary Disease |          |         |          |          |         |          |

|                            |         |         |          |         |         |         |
|----------------------------|---------|---------|----------|---------|---------|---------|
| 496                        | J47.0   | 492.8   | 494.0    | J41.8   | J45.42  | 491.20  |
| 493.10                     | 493.12  | 491.8   | J45.20   | J43.1   | 493.21  | J45.31  |
| 493.11                     | 493.20  | J45.32  | J44.1    | J41.1   | 491.9   | J45.30  |
| J44.9                      | 494.1   | J43.9   | J43.8    | J45.50  | J45.40  | J43.2   |
| J43.0                      | 491.21  | J45.52  | J42      | J44.0   | J47.1   | 491.1   |
| J45.21                     | J45.41  | 491.22  | 493.22   | 493.01  | J45.22  | J47.9   |
| J45.51                     | 493.02  | 493.00  | 492.0    | ..      | ..      | ..      |
|                            |         |         |          |         |         |         |
| Atrial Fibrillation        |         |         |          |         |         |         |
| 427.32                     | I48.0   | I48.4   | I48.92   | I48.1   | 427.31  | I48.3   |
| I48.2                      | I48.91  | ..      | ..       | ..      | ..      | ..      |
|                            |         |         |          |         |         |         |
| AGC Valvular Heart Disease |         |         |          |         |         |         |
| 115.04                     | I39     | I34.9   | I37.0    | I35.0   | 424.1   | 424.3   |
| I36.8                      | I37.1   | I36.9   | I34.0    | I34.8   | 424.91  | 424.2   |
| I35.9                      | I38     | 424.99  | I35.1    | I35.2   | 115.14  | I34.2   |
| I37.8                      | I35.8   | 421.1   | I36.0    | I36.2   | 424.0   | I34.1   |
| I37.2                      | 424.90  | I36.1   | 115.94   | I37.9   | ..      | ..      |
|                            |         |         |          |         |         |         |
| Coronary Artery Disease    |         |         |          |         |         |         |
| 414.02                     | I25.119 | I25.711 | I25.750  | I25.42  | I25.798 | I25.738 |
| 414.10                     | I25.82  | I25.769 | I25.812  | I25.89  | I25.730 | I25.710 |
| I25.718                    | I25.811 | I25.10  | I25.110  | I20.8   | I25.3   | 414.06  |
| I25.791                    | I25.83  | 413.9   | 414.01   | I25.731 | I25.761 | 414.07  |
| I25.111                    | I25.701 | 414.9   | 414.12   | I20.1   | I25.9   | 414.04  |
| I25.708                    | 414.00  | 413.1   | 414.2    | 413.0   | I25.721 | I25.84  |
| I25.729                    | 414.3   | I20.9   | 414.19   | 414.03  | I25.700 | I25.790 |
| I25.739                    | I25.760 | I25.751 | 414.11   | 414.4   | I25.118 | I25.709 |
| 414.8                      | I25.799 | I25.5   | 414.05   | I25.41  | I25.768 | I25.759 |
| I25.758                    | I25.810 | I25.728 | I25.719  | I25.6   | I25.720 | ..      |
|                            |         |         |          |         |         |         |
| Stroke                     |         |         |          |         |         |         |
| 433.00                     | I60.31  | 803.26  | 433.01   | 801.21  | I60.4   | 800.79  |
| 433.91                     | I62.1   | I63.532 | 434.11   | 804.26  | I60.8   | 997.02  |
| 800.26                     | G45.9   | I60.52  | 801.76   | 800.29  | I61.5   | 852.36  |
| 852.19                     | I63.113 | I63.12  | 453.86   | 803.71  | I63.331 | 803.21  |
| 286.7                      | 434.91  | I65.21  | I65.22   | 342.82  | I63.6   | 434.90  |
| 803.29                     | 800.21  | H34.11  | I66.9    | 803.76  | I67.6   | 852.11  |
| 432.1                      | 801.26  | I63.411 | I60.2    | 800.71  | I60.9   | 432.9   |
| 852.09                     | 433.11  | I63.233 | I63.131  | 433.10  | I63.012 | 437.6   |
| I60.01                     | 800.20  | I63.031 | I66.01   | 800.70  | I63.421 | I61.4   |
| I63.511                    | 342.81  | I63.10  | I62.00   | I63.02  | I63.22  | I63.20  |
| D68.32                     | 342.92  | I77.0   | S06.6X0A | I63.112 | I66.02  | I63.423 |

|                                |         |         |         |          |         |          |
|--------------------------------|---------|---------|---------|----------|---------|----------|
| G81.94                         | 435.3   | I60.00  | I82.C12 | I63.59   | 435.0   | I63.541  |
| I60.11                         | 852.01  | Q28.2   | I63.533 | I63.132  | 435.1   | I60.32   |
| I62.02                         | 852.26  | 804.20  | I65.02  | I63.211  | 433.21  | I63.8    |
| I65.03                         | 801.20  | 801.71  | 852.10  | I63.213  | 804.70  | I69.354  |
| I63.312                        | 447.0   | 852.00  | 853.01  | I60.50   | 804.71  | G81.91   |
| I63.413                        | 803.20  | I60.30  | 453.40  | I69.898  | 804.79  | I63.232  |
| I63.513                        | H34.232 | I65.1   | 336.1   | I60.7    | 433.31  | I63.522  |
| I63.543                        | I63.531 | I63.432 | I61.2   | I65.23   | 432.0   | I63.39   |
| I61.9                          | I62.03  | I63.539 | I61.3   | I60.02   | 801.29  | I63.441  |
| I63.032                        | I62.9   | 453.82  | I61.6   | I60.12   | 803.70  | I63.442  |
| I62.01                         | I63.419 | 342.91  | I63.231 | I61.8    | 804.29  | I60.10   |
| I63.412                        | I63.311 | 362.32  | I63.29  | I63.111  | 801.79  | 852.39   |
| I63.521                        | I63.422 | 433.81  | I63.50  | I63.542  | I61.0   | 804.21   |
| I97.820                        | I63.011 | 434.00  | I60.6   | S06.5X9A | I63.322 | I63.212  |
| I63.40                         | I69.298 | 435.9   | I61.1   | I63.9    | I63.512 | I82.622  |
| 804.76                         | I63.321 | 801.70  | I65.01  | 852.29   | G95.11  | 438.89   |
| 747.81                         | I63.49  | 803.79  | I63.431 | 800.76   | I63.449 | 430      |
| 433.20                         | H34.231 | 362.31  | G45.0   | 431      | I82.401 | S06.340A |
| 434.01                         | I63.30  | 438.22  | 434.10  | I60.51   | ..      | ..       |
|                                |         |         |         |          |         |          |
| Congestive Heart Failure       |         |         |         |          |         |          |
| 417.9                          | 425.7   | I27.29  | 428.20  | I50.84   | I28.0   | I50.83   |
| 425.8                          | 428.43  | I50.812 | 398.91  | 417.8    | I42.3   | I11.0    |
| 425.9                          | I42.0   | I27.1   | 429.0   | 428.30   | I42.1   | I50.33   |
| 425.5                          | I50.811 | I50.814 | I28.8   | 428.33   | I50.21  | I27.23   |
| 416.9                          | I43     | I50.9   | I27.20  | 404.93   | I42.4   | A18.84   |
| 428.42                         | I26.01  | I27.0   | I50.41  | 416.0    | 425.0   | I09.81   |
| I13.2                          | I50.89  | I27.81  | I42.8   | 402.91   | 428.21  | 415.0    |
| I50.30                         | I26.02  | I13.0   | 404.11  | 416.1    | 428.22  | 428.41   |
| I51.5                          | I50.31  | I42.2   | I42.7   | 425.4    | 416.8   | 402.11   |
| I50.20                         | I51.4   | 404.13  | I50.813 | 404.01   | 425.3   | 417.1    |
| I50.42                         | 428.31  | 429.1   | I42.5   | I50.32   | 425.2   | 428.40   |
| I42.9                          | 402.01  | 417.0   | I50.23  | I50.82   | 428.9   | I27.21   |
| 428.1                          | 404.91  | 428.0   | I50.810 | I50.43   | 428.23  | I27.22   |
| 428.32                         | I28.9   | 404.03  | I50.40  | 126.09   | 142.6   | I50.22   |
| 425.18                         | I27.9   | 425.11  | I27.24  | 128.1    | 150.1   | ..       |
|                                |         |         |         |          |         |          |
| Chronic Kidney Disease Stage 3 |         |         |         |          |         |          |
| 585.3                          | N18.32  | N18.3   | N18.30  | N18.31   | ..      | ..       |
|                                |         |         |         |          |         |          |
| Chronic Kidney Disease Stage 4 |         |         |         |          |         |          |
| N18.4                          | 585.4   | ..      | ..      | ..       | ..      | ..       |
|                                |         |         |         |          |         |          |

|                                |        |         |         |        |         |         |
|--------------------------------|--------|---------|---------|--------|---------|---------|
| Chronic Kidney Disease Stage 5 |        |         |         |        |         |         |
| N18.5                          | 585.5  | ..      | ..      | ..     | ..      | ..      |
| End Stage Renal Disease        |        |         |         |        |         |         |
| 585.6                          | N18.6  | V45.12  | V45.11  | Z99.2  | Z91.15  | ..      |
| Cancer                         |        |         |         |        |         |         |
| 148.2                          | 205.81 | C44.92  | C93.Z0  | 140.4  | C01     | C91.Z0  |
| 173.01                         | 208.82 | C72.22  | C4A.4   | 144.1  | C15.8   | C7B.04  |
| 173.62                         | 209.23 | C83.18  | C4A.52  | 150.5  | C48.0   | C94.40  |
| 173.71                         | 209.25 | C83.99  | C08.1   | 162.2  | C34.80  | C15.3   |
| 182.8                          | 142.0  | C82.91  | C10.4   | 162.8  | C44.611 | C18.9   |
| 183.5                          | 147.2  | C82.43  | C25.0   | 170.5  | C44.711 | C31.3   |
| 188.1                          | 151.5  | C91.40  | C44.591 | 173.09 | C44.80  | C34.10  |
| 196.3                          | 153.7  | C84.A3  | C83.34  | 173.90 | C44.81  | C34.31  |
| 197.5                          | 173.52 | C85.13  | C83.85  | 187.6  | C62.91  | C38.3   |
| 238.79                         | 201.47 | C93.11  | C81.08  | 198.81 | C66.1   | C47.6   |
| 160.2                          | 201.75 | C7A.8   | C82.63  | 202.36 | C69.32  | C43.20  |
| 173.12                         | 202.98 | C02.2   | C82.37  | 202.74 | C70.0   | C44.01  |
| 173.29                         | 203.12 | C03.9   | C85.80  | 204.82 | C73     | C50.412 |
| 200.54                         | 207.82 | C16.1   | C95.00  | 208.11 | C83.32  | C50.022 |
| 201.53                         | 209.22 | C31.0   | C95.12  | 209.14 | C83.53  | C46.7   |
| 204.22                         | 153.5  | C83.52  | C4A.10  | 170.4  | C83.91  | C71.5   |
| 205.10                         | 157.2  | C83.81  | C02.1   | 176.2  | C83.05  | C76.51  |
| 209.13                         | 172.4  | C83.88  | C07     | 196.5  | C81.09  | C76.8   |
| 209.73                         | 173.59 | C83.16  | C13.1   | 198.82 | C82.40  | C83.87  |
| 153.1                          | 173.60 | C83.96  | C24.9   | 200.65 | C82.32  | C81.70  |
| 170.1                          | 197.8  | C81.16  | C25.3   | 203.01 | C82.13  | C81.48  |
| 173.91                         | 200.24 | C84.42  | C48.1   | 204.81 | C82.35  | C81.28  |
| 196.6                          | 201.77 | C92.00  | C47.21  | 205.00 | C82.96  | C81.96  |
| 200.38                         | 201.90 | C7A.093 | C44.219 | 172.8  | C84.41  | C82.29  |
| 201.12                         | 205.92 | C02.3   | C44.320 | 181    | C4A.21  | C84.A8  |
| 201.22                         | 206.20 | C39.9   | C46.52  | 187.3  | C06.9   | C91.51  |
| 201.52                         | 207.00 | C44.319 | C53.8   | 200.86 | C34.12  | C92.A0  |
| 202.91                         | 209.11 | C57.21  | C57.02  | 202.96 | C43.30  | C92.90  |
| 173.19                         | 160.8  | C69.22  | C83.83  | 206.92 | C44.112 | C94.42  |
| 180.0                          | 184.1  | C75.2   | C83.11  | 142.8  | C44.212 | C05.2   |
| 185                            | 190.9  | C80.0   | C83.06  | 143.9  | C44.509 | C22.9   |
| 202.37                         | 200.05 | C83.19  | C81.97  | 176.5  | C44.629 | C40.92  |
| 204.00                         | 200.31 | C84.67  | C82.99  | 200.30 | C50.611 | C47.20  |
| 209.20                         | 201.76 | C82.82  | C82.03  | 201.70 | C50.819 | C44.91  |
| 209.26                         | 202.63 | C82.23  | 155.2   | 201.94 | C50.329 | C50.112 |
| 209.27                         | 204.12 | C85.14  | 161.0   | 202.54 | C46.50  | C58     |

|        |         |         |        |         |         |         |
|--------|---------|---------|--------|---------|---------|---------|
| 209.32 | 205.30  | C85.96  | 170.3  | 202.84  | C60.1   | C51.0   |
| 147.8  | C00.3   | C88.2   | 196.1  | C00.8   | C68.0   | C63.00  |
| 148.0  | C03.0   | C91.A2  | 201.15 | C44.192 | C79.32  | C69.01  |
| 150.8  | C10.2   | C7A.026 | 146.9  | C44.89  | C81.46  | C79.10  |
| 172.2  | C10.3   | C4A.31  | 148.9  | C46.2   | C81.20  | C83.00  |
| 183.3  | C13.0   | C04.0   | 162.5  | C69.60  | C81.29  | C81.34  |
| 189.8  | C13.2   | C34.92  | 173.22 | C69.11  | C84.00  | C82.93  |
| 200.56 | C16.2   | C40.01  | 173.31 | C79.62  | C84.11  | C85.90  |
| 201.10 | C16.6   | C44.590 | 189.0  | C83.50  | C84.18  | C91.01  |
| 201.43 | C21.0   | C44.602 | 196.2  | C83.51  | C85.10  | C91.A0  |
| 201.66 | C38.4   | C61     | 197.4  | C85.20  | C84.98  | C94.02  |
| 202.12 | C43.8   | C67.9   | 200.42 | C81.13  | C96.4   | C95.01  |
| 202.32 | C50.612 | C74.02  | 202.24 | C81.24  | C91.60  | C95.90  |
| 202.82 | C50.429 | C78.80  | 202.85 | C82.86  | C15.5   | C4A.22  |
| 202.83 | C53.9   | C83.30  | 204.10 | C82.56  | C48.2   | C4A.62  |
| 203.00 | C77.9   | C83.97  | 207.01 | C88.3   | C44.00  | C23     |
| 207.20 | C79.72  | C81.36  | 209.31 | C93.30  | C44.500 | C49.22  |
| 150.0  | C81.03  | C82.00  | 209.72 | C95.11  | C50.519 | C44.99  |
| 184.8  | C82.41  | C82.81  | 146.1  | C7B.02  | C50.321 | C50.221 |
| 190.7  | C86.2   | C84.Z7  | 151.0  | C09.9   | C67.6   | C65.1   |
| 200.50 | C85.87  | C85.88  | 174.9  | C14.8   | C83.04  | C77.3   |
| 200.61 | C82.58  | C7A.090 | 183.0  | C34.81  | C81.94  | C81.72  |
| 201.18 | C92.50  | C49.3   | 190.5  | C39.0   | C82.17  | C82.80  |
| 202.60 | C93.91  | C46.9   | 194.5  | C40.91  | C82.87  | C82.02  |
| 209.12 | C94.81  | C56.9   | 200.74 | C44.119 | C82.28  | C4A.51  |
| 159.8  | C7A.022 | C69.61  | 200.83 | C72.30  | C91.61  | C16.0   |
| 165.0  | C12     | C69.50  | 201.27 | C72.40  | C92.61  | C40.81  |
| 191.4  | C14.2   | C78.5   | 202.03 | C72.1   | C88.0   | C43.12  |
| 191.8  | C34.02  | C82.51  | 202.31 | C70.1   | C05.9   | C43.61  |
| 200.46 | C40.21  | C91.30  | 202.41 | C77.1   | C06.89  | C43.9   |
| 200.51 | C43.72  | C92.32  | 202.62 | C79.01  | C11.8   | C44.511 |
| 200.64 | C44.729 | C00.4   | 204.20 | C83.73  | C41.2   | C50.411 |
| 202.34 | C44.90  | C06.80  | 207.21 | C84.69  | C44.191 | C50.229 |
| 207.02 | C50.822 | C34.82  | 145.5  | C83.94  | C44.692 | C53.0   |
| 141.3  | C54.0   | C44.619 | 154.8  | C81.76  | C44.82  | C57.10  |
| 144.0  | C71.0   | C50.211 | 160.0  | C81.38  | C50.912 | C63.02  |
| 144.8  | C72.20  | C50.311 | 171.9  | C82.07  | C63.9   | C72.21  |
| 148.8  | C72.32  | C54.1   | 173.82 | C84.Z0  | C67.1   | C74.00  |
| 173.99 | C79.19  | C69.21  | 197.2  | C85.82  | C67.3   | C75.3   |
| 174.6  | C81.31  | C69.81  | 200.36 | C82.53  | C76.40  | C75.8   |
| 200.08 | C82.69  | C72.31  | 141.0  | C92.A2  | C83.38  | C77.2   |
| 200.57 | C84.09  | C74.01  | 141.2  | C4A.8   | C84.63  | C79.11  |
| 201.16 | C84.Z5  | C79.31  | 151.4  | C96.5   | C85.28  | C83.72  |



|         |         |        |        |         |         |         |
|---------|---------|--------|--------|---------|---------|---------|
| 201.50  | C91.00  | C83.12 | 157.9  | C10.1   | C81.10  | C83.80  |
| 202.17  | C92.40  | C84.78 | 171.8  | C14.0   | C82.30  | C84.68  |
| 202.22  | C7A.010 | C81.91 | 173.50 | C31.9   | C84.16  | C82.84  |
| 203.11  | C7B.03  | C84.05 | 187.2  | C37     | C84.46  | C82.47  |
| 207.80  | C00.6   | C4A.71 | 190.1  | C40.00  | C86.0   | C85.18  |
| 209.35  | C32.2   | C00.0  | 192.8  | C47.10  | C84.Z2  | C96.Z   |
| C09.1   | C40.12  | C18.4  | 196.8  | C49.A3  | C82.57  | C90.20  |
| C26.9   | C49.A2  | C22.2  | 198.3  | C44.390 | C92.41  | C90.31  |
| C32.9   | C47.9   | C34.01 | 201.00 | C44.621 | C7A.019 | C92.31  |
| C34.32  | C44.109 | C67.8  | 146.7  | C60.2   | C4A.70  | C84.12  |
| C38.1   | C44.229 | C64.2  | 157.1  | C69.40  | C11.2   | C84.A1  |
| C57.11  | C44.519 | C69.92 | 157.4  | C69.62  | C49.0   | C84.Z4  |
| C79.61  | C50.911 | C74.11 | 170.9  | C72.59  | C44.309 | C82.55  |
| C84.70  | C79.89  | C75.4  | 176.4  | C83.35  | C50.121 | C90.32  |
| C84.79  | C83.03  | C75.5  | 183.4  | C84.74  | C57.12  | C86.6   |
| C82.36  | C92.20  | C88.4  | 186.0  | C81.39  | C51.8   | C81.21  |
| C84.19  | C94.00  | C81.06 | 201.02 | C96.21  | C69.12  | C85.19  |
| C84.17  | C95.10  | C81.47 | 201.63 | C84.A9  | C77.5   | C91.Z2  |
| C96.20  | C96.6   | C81.27 | 202.27 | C91.90  | C83.14  | C7A.012 |
| C94.22  | C17.0   | C82.45 | 204.01 | C21.1   | C81.78  | 202.71  |
| C4A.72  | C47.0   | C82.27 | 204.21 | C21.8   | C81.25  | 208.00  |
| C7B.09  | C43.60  | C85.17 | 209.21 | C48.8   | C81.92  | 208.81  |
| C40.82  | C44.300 | C90.10 | 149.8  | C49.11  | C84.99  | 208.92  |
| C44.520 | C50.511 | C90.21 | 173.10 | C44.122 | C85.15  | 209.70  |
| C67.4   | C50.929 | 144.9  | 173.40 | C44.292 | C86.1   | C81.40  |
| C69.02  | C53.1   | 156.2  | 190.8  | C50.419 | C91.31  | C82.42  |
| C75.0   | C54.9   | 173.00 | 202.45 | C46.4   | C7B.1   | C84.92  |
| C83.13  | C64.1   | 179    | 205.11 | C57.4   | C7B.8   | C84.A5  |
| C84.64  | C74.91  | 192.1  | 145.8  | C51.2   | C47.8   | C92.42  |
| C82.15  | C83.15  | 195.5  | 147.1  | C74.92  | C44.09  | C86.3   |
| C84.95  | C84.61  | 197.1  | 151.6  | C78.39  | C44.699 | C16.9   |
| C90.02  | C84.71  | 198.4  | 153.8  | C83.79  | C50.512 | C49.20  |
| C91.11  | C81.17  | 201.01 | 159.1  | C83.10  | C57.00  | C44.222 |
| C93.Z2  | C81.35  | 201.26 | 160.4  | C84.73  | C63.10  | C44.42  |
| C11.0   | C82.19  | 201.48 | 161.3  | C82.20  | C69.30  | 174.3   |
| C49.4   | C82.90  | 201.67 | 180.9  | C82.60  | C75.9   | 198.0   |
| C43.59  | C82.04  | 202.01 | 183.2  | C82.18  | C78.7   | 200.17  |
| C44.291 | C82.85  | 202.35 | 200.03 | C82.68  | C81.32  | 200.76  |
| C44.702 | C84.07  | 202.67 | 201.06 | C82.59  | C82.95  | 201.13  |
| C50.029 | C84.14  | 161.9  | 201.20 | C88.8   | C84.Z1  | C7A.095 |
| C50.821 | C84.91  | 187.1  | 202.50 | C92.12  | C91.12  | C13.8   |
| C50.829 | C85.11  | 200.04 | 203.10 | C94.21  | C94.20  | C34.91  |
| C54.2   | C92.22  | 200.13 | 205.02 | C15.4   | C7A.025 | C47.22  |

|         |         |        |         |         |         |         |
|---------|---------|--------|---------|---------|---------|---------|
| C84.65  | C94.01  | 200.37 | 206.90  | C40.11  | C22.0   | C44.622 |
| C82.61  | C4A.11  | 200.41 | C40.10  | C50.529 | C25.4   | C50.811 |
| C91.41  | C17.8   | 201.25 | C40.20  | C56.1   | C50.322 | C56.2   |
| C82.50  | C34.30  | 202.11 | C43.0   | C81.14  | C57.20  | C63.7   |
| C85.84  | C40.80  | 202.87 | C43.70  | C82.62  | C51.1   | C74.90  |
| C85.86  | C47.12  | 141.1  | C50.129 | C82.24  | C69.10  | C79.52  |
| C88.9   | C49.9   | 183.8  | C63.01  | C85.91  | C69.82  | C81.41  |
| C92.02  | C46.51  | 189.9  | C67.2   | C7A.029 | C78.2   | C84.13  |
| C08.9   | C79.51  | 199.0  | C69.51  | C7A.096 | C79.2   | C96.29  |
| C17.3   | C79.71  | 200.80 | C72.41  | C4A.0   | C85.27  | C84.45  |
| C18.3   | C85.26  | 201.62 | C83.76  | C4A.61  | C81.79  | C84.97  |
| C32.8   | C90.00  | 201.91 | C85.24  | C02.4   | C82.92  | C90.01  |
| C43.51  | C93.31  | 201.98 | C81.02  | C08.0   | C82.05  | C17.2   |
| C43.71  | C00.1   | 202.44 | C82.09  | C06.1   | C84.10  | C43.22  |
| C50.621 | C25.9   | 205.80 | C82.01  | C33     | C84.48  | C44.311 |
| C83.58  | C44.199 | 162.9  | C82.25  | C34.00  | C85.83  | C44.510 |
| C83.84  | C50.019 | 164.8  | C84.Z3  | C38.2   | C92.01  | C83.33  |
| C81.43  | C55     | 184.4  | C92.60  | C41.3   | C93.32  | C83.93  |
| C81.11  | C54.3   | 190.4  | C92.91  | C44.521 | C7A.00  | C83.08  |
| C81.18  | C62.11  | 191.0  | C49.21  | C44.712 | C4A.39  | C82.22  |
| C81.90  | C77.0   | 200.52 | C47.4   | C46.1   | 165.8   | 164.2   |
| C82.10  | C85.21  | 205.12 | C49.A5  | C68.8   | 170.8   | 173.21  |
| C94.31  | C83.90  | 151.3  | C43.11  | C76.2   | 171.3   | 173.70  |
| C09.8   | C86.5   | 156.1  | C43.31  | C79.9   | 188.8   | 194.3   |
| C18.1   | C83.01  | 160.3  | C44.102 | C84.44  | 200.21  | 194.8   |
| C49.10  | C83.98  | 161.2  | C44.612 | C92.Z0  | 200.28  | 201.05  |
| C43.21  | C81.42  | 162.0  | C50.122 | C92.Z2  | 202.38  | 202.28  |
| C44.121 | C81.95  | 165.9  | C57.8   | C94.82  | 206.02  | 202.93  |
| C44.209 | C84.94  | 187.8  | C62.10  | C49.A4  | 173.92  | 205.21  |
| C44.701 | C91.50  | 200.02 | C62.92  | C43.39  | 194.9   | 206.91  |
| C50.119 | C7A.094 | 201.92 | C63.8   | C44.211 | 198.5   | 208.01  |
| C50.619 | C4A.9   | 204.02 | C78.01  | C50.522 | 200.18  | 208.90  |
| C65.2   | C7B.00  | 209.15 | C79.81  | C76.3   | 200.63  | C13.9   |
| C69.52  | C03.1   | 154.0  | C83.55  | C78.30  | 200.70  | C22.7   |
| C69.00  | C16.8   | 172.5  | C83.02  | C79.00  | 200.82  | C32.3   |
| C69.91  | C22.8   | 175.0  | C82.49  | C84.60  | 201.17  | C38.8   |
| C71.6   | C25.1   | 201.24 | C82.83  | C84.62  | 203.02  | C47.5   |
| C80.2   | C41.9   | 201.65 | C96.22  | C84.72  | 152.9   | C44.719 |
| C85.22  | C44.129 | 202.18 | C90.12  | C81.00  | 184.3   | C46.0   |
| C81.71  | C50.422 | 143.1  | C49.A9  | C81.49  | 188.7   | C52     |
| C81.75  | C69.80  | 147.3  | C43.52  | C82.14  | 195.1   | C60.9   |
| C81.07  | C76.52  | 150.1  | C44.299 | C84.43  | 197.0   | C69.20  |
| C96.A   | C83.56  | 171.6  | C44.529 | C85.85  | 201.55  | C74.12  |

|         |         |         |         |         |        |         |
|---------|---------|---------|---------|---------|--------|---------|
| C91.42  | C82.67  | 173.51  | C50.521 | C85.16  | 202.46 | C84.66  |
| C90.22  | C84.04  | 174.2   | C54.8   | C7A.024 | 202.95 | 189.3   |
| C92.30  | C96.0   | 192.2   | C78.6   | C7A.092 | 206.11 | 196.0   |
| C93.12  | C84.49  | 201.71  | C81.73  | C22.3   | 209.02 | 200.01  |
| C4A.30  | C92.52  | 202.66  | C81.05  | C25.2   | 143.8  | 200.25  |
| C05.0   | C7A.011 | 202.81  | C81.30  | C34.2   | 150.4  | 200.75  |
| C05.1   | C00.9   | 206.10  | C82.34  | C50.012 | 151.9  | 202.13  |
| C22.4   | C16.4   | 208.22  | C82.94  | C50.319 | 152.1  | 207.22  |
| C24.0   | C31.2   | 145.1   | C84.90  | C50.921 | 190.3  | 208.02  |
| C49.A1  | C41.1   | 145.4   | C91.52  | C67.0   | 195.8  | 209.29  |
| C44.41  | C50.011 | 145.9   | C4A.60  | C81.15  | 200.45 | 209.75  |
| C44.721 | C50.622 | 146.2   | C04.8   | C82.16  | 200.73 | 154.3   |
| C51.9   | C78.02  | 153.4   | C06.2   | C84.08  | 202.21 | 160.5   |
| C57.9   | C85.23  | 156.9   | C15.9   | C85.89  | 202.64 | 164.0   |
| C62.02  | C85.97  | 158.8   | C16.5   | C85.98  | 209.03 | 184.9   |
| C71.4   | C94.6   | 171.5   | C18.8   | C91.Z1  | 141.6  | 195.3   |
| C45.7   | 141.9   | 172.6   | C24.8   | C93.90  | 196.9  | 202.58  |
| C83.74  | 162.4   | 173.39  | C26.0   | C4A.59  | 200.32 | 148.1   |
| C82.65  | 164.1   | 191.5   | C31.1   | 140.5   | 200.35 | 155.0   |
| C82.97  | 174.1   | 198.1   | C38.0   | 156.0   | 201.58 | 159.0   |
| C82.38  | 200.22  | 200.44  | C44.792 | 163.8   | 202.06 | 171.7   |
| C82.98  | 200.48  | 200.77  | C50.222 | 173.49  | 202.42 | 174.0   |
| C90.30  | 200.62  | 201.07  | C50.421 | 174.5   | 202.47 | 194.1   |
| C92.Z1  | 201.11  | 201.74  | C79.49  | 200.68  | 204.91 | 200.53  |
| C93.02  | 202.15  | 202.52  | C79.60  | 201.23  | 145.3  | 202.14  |
| C94.80  | 202.57  | 206.80  | C92.A1  | 203.81  | 150.3  | C02.0   |
| C7A.1   | 202.86  | 206.81  | C7A.021 | 209.74  | 152.0  | C22.1   |
| C02.8   | 206.01  | C20     | C10.0   | 142.9   | 157.3  | C44.399 |
| C40.30  | 273.3   | C32.1   | C30.1   | 143.0   | 160.1  | C44.40  |
| C49.A0  | 140.1   | C40.90  | C41.4   | 173.89  | 172.9  | C50.212 |
| C49.6   | 146.3   | C49.12  | C44.221 | 188.9   | 182.1  | C50.922 |
| C44.02  | 191.2   | C49.8   | C44.709 | 191.7   | 187.9  | C57.01  |
| C44.501 | 194.6   | C43.10  | C50.812 | 200.20  | 190.6  | C69.42  |
| C44.609 | 195.2   | C44.791 | C63.11  | 202.43  | 200.12 | C75.1   |
| C44.691 | 198.6   | C46.3   | C64.9   | 202.76  | 201.78 | C78.89  |
| C62.01  | 200.14  | C62.00  | C76.41  | 205.22  | 201.96 | C83.07  |
| C71.8   | 200.88  | C70.9   | C78.1   | 206.82  | 202.05 | C81.77  |
| C76.1   | 201.14  | C83.75  | C79.40  | 209.00  | 202.08 | C81.23  |
| C83.59  | 201.21  | C81.22  | C84.76  | 145.6   | 202.20 | C82.31  |
| C82.39  | 201.57  | C82.21  | C83.92  | 146.5   | 202.92 | C85.12  |
| C82.26  | 202.94  | C82.33  | C81.33  | 149.1   | 206.12 | C93.00  |
| C84.Z6  | 208.80  | C82.08  | C82.11  | 152.8   | 141.4  | C10.9   |
| C84.A7  | 208.91  | C85.99  | C84.A0  | 173.79  | 154.2  | C40.22  |

|         |        |         |         |        |         |         |
|---------|--------|---------|---------|--------|---------|---------|
| C91.92  | 140.0  | C82.54  | C96.9   | 180.8  | 163.1   | C44.111 |
| C7A.023 | 147.0  | C84.A4  | C09.0   | 195.4  | 173.20  | C44.301 |
| C94.41  | 149.9  | C95.02  | C11.9   | 200.16 | 173.30  | C44.391 |
| C16.3   | 164.3  | C7A.098 | C19     | 200.27 | 184.2   | C63.12  |
| C18.5   | 192.0  | C7B.01  | C25.7   | 201.73 | 191.1   | C72.42  |
| C34.11  | 201.28 | C11.1   | C45.1   | 202.23 | 197.6   | C76.50  |
| C45.0   | 202.40 | C49.5   | C26.1   | 202.78 | 197.7   | 191.6   |
| C45.2   | 202.65 | C43.4   | C44.601 | 208.20 | 198.2   | 200.00  |
| C40.32  | 204.90 | C43.62  | C44.799 | 141.8  | 201.72  | 200.34  |
| C47.3   | 206.00 | C50.021 | C71.1   | 142.2  | 202.48  | 200.85  |
| C44.201 | 209.10 | C62.12  | C71.3   | 153.9  | 203.82  | 200.87  |
| C69.31  | 209.36 | C60.0   | C72.50  | 155.1  | 204.11  | 201.60  |
| C69.90  | 209.79 | C65.9   | C84.75  | 158.9  | 205.01  | 202.02  |
| C78.00  | 146.8  | C74.10  | C83.95  | 170.7  | 205.82  | 202.30  |
| C83.54  | 150.9  | C76.0   | C82.46  | 187.4  | 157.8   | 202.73  |
| C83.89  | 153.6  | C78.4   | C85.81  | 187.5  | 161.8   | 209.17  |
| C83.82  | 173.32 | C79.02  | C91.32  | 188.5  | 173.42  | 209.71  |
| C81.74  | 175.9  | C80.1   | C05.8   | 200.40 | 197.3   | C17.9   |
| C81.26  | 200.71 | C82.66  | C11.3   | 200.66 | 199.2   | C18.7   |
| C81.37  | 201.41 | C84.Z9  | C47.11  | 201.04 | 200.10  | C30.0   |
| C82.89  | 204.80 | C86.4   | C44.321 | 201.64 | 200.72  | C44.202 |
| C84.03  | 172.1  | C85.93  | C44.49  | 202.25 | 200.78  | C57.3   |
| C84.A2  | 176.3  | C91.91  | C67.7   | 202.97 | 200.81  | C57.22  |
| C91.02  | 191.9  | C92.51  | C69.41  | 205.91 | 201.56  | C66.9   |
| C92.62  | 195.0  | C06.0   | C71.9   | 140.3  | 202.75  | C71.7   |
| C92.10  | 200.47 | C24.1   | C77.4   | 151.1  | C00.5   | C83.39  |
| C92.92  | 200.60 | C44.310 | C83.71  | 164.9  | C02.9   | C82.44  |
| C93.01  | 200.84 | C62.90  | C83.78  | 171.4  | C10.8   | C82.06  |
| C93.Z1  | 201.44 | C68.1   | C84.77  | 173.80 | C18.2   | C84.01  |
| 140.8   | 202.04 | C72.0   | C81.98  | 180.1  | C34.90  | C82.52  |
| 151.8   | 202.10 | C83.31  | C82.12  | 188.3  | C44.101 | 200.58  |
| 163.9   | 202.33 | C83.70  | C84.06  | 192.3  | C44.722 | 201.03  |
| 173.72  | 202.80 | C83.77  | C91.10  | 201.42 | C50.219 | 201.54  |
| 184.0   | 205.20 | C85.29  | C91.A1  | 209.01 | C60.8   | 201.93  |
| 200.11  | 209.16 | C85.25  | C7A.091 | 151.2  | C83.17  | 201.97  |
| 201.61  | 142.1  | C81.19  | C4A.12  | 153.0  | C83.09  | 202.90  |
| 201.68  | 149.0  | C82.48  | C4A.20  | 171.0  | C81.01  | 205.90  |
| 202.26  | 153.2  | C82.88  | C04.9   | 173.11 | C81.45  | 207.81  |
| 202.55  | 170.2  | C90.11  | C50.312 | 173.69 | C82.64  | 148.3   |
| 203.80  | 174.4  | C94.32  | C71.2   | 188.2  | C85.94  | 153.3   |
| 156.8   | 176.1  | C00.2   | C79.82  | 190.0  | C84.A6  | 172.3   |
| 159.9   | 186.9  | C04.1   | C45.9   | 199.1  | C93.92  | 176.9   |
| 161.1   | 194.4  | C18.6   | C83.86  | 200.06 | C95.92  | 191.3   |

|                      |         |         |         |         |         |         |
|----------------------|---------|---------|---------|---------|---------|---------|
| 176.8                | 205.32  | C31.8   | C81.44  | 200.55  | C17.1   | 193     |
| 183.9                | 208.12  | C32.0   | C81.12  | 204.92  | C18.0   | 194.0   |
| 192.9                | 209.34  | C40.02  | C81.99  | 209.24  | C21.2   | 198.89  |
| 198.7                | 140.6   | C40.31  | C85.95  | 209.30  | C25.8   | 200.26  |
| 200.07               | 145.0   | C44.329 | C84.Z8  | 154.1   | C41.0   | 200.43  |
| 201.46               | 147.9   | C50.111 | C92.21  | 173.02  | C44.599 | 202.70  |
| 201.95               | 150.2   | C50.919 | C95.91  | 173.61  | C63.2   | 202.72  |
| 202.53               | 170.6   | C50.629 | 140.9   | 174.8   | C67.5   | 206.21  |
| 202.61               | 171.2   | C57.7   | 146.0   | 182.0   | C66.2   | 141.5   |
| 202.68               | 172.7   | C79.70  | 200.33  | 189.4   | C68.9   | 163.0   |
| 208.21               | 176.0   | C83.37  | 201.40  | 200.15  | C72.9   | 173.81  |
| 209.33               | 188.4   | C83.57  | 201.51  | 200.67  | C76.42  | C7A.020 |
| 145.2                | 189.2   | C81.04  | 202.56  | 201.08  | C77.8   | 152.2   |
| 146.6                | 190.2   | C84.02  | 202.77  | 202.00  | C83.36  | 173.41  |
| 158.0                | 201.45  | C84.15  | 205.31  | 202.07  | C81.93  | C94.30  |
| 170.0                | 202.16  | C84.40  | 152.3   | 202.51  | C84.47  | 189.1   |
| 172.0                | 208.10  | C85.92  | 157.0   | 202.88  | C84.96  | 200.23  |
| 187.7                | 146.4   | C84.93  | 160.9   | 206.22  | C92.11  | C93.10  |
| 188.0                | 188.6   | C91.62  | 162.3   | 277.89  | ..      | ..      |
|                      |         |         |         |         |         |         |
| Fatty Liver Disease  |         |         |         |         |         |         |
| K75.81               | K76.89  | 571.8   | K70.0   | 571.0   | K76.0   | ..      |
|                      |         |         |         |         |         |         |
| Allergic Rhinitis    |         |         |         |         |         |         |
| 472.0                | J30.1   | 477.0   | 477.2   | J30.0   | 477.9   | 477.1   |
| J30.2                | J30.9   | J31.0   | J30.81  | 477.8   | J30.5   | J30.89  |
|                      |         |         |         |         |         |         |
| Rheumatoid Arthritis |         |         |         |         |         |         |
| M05.429              | M05.679 | M06.849 | M05.071 | M05.272 | M05.871 | M06.259 |
| M05.459              | M05.431 | M05.532 | M05.09  | M06.042 | M06.272 | M05.029 |
| M05.711              | M05.829 | M05.59  | M05.211 | M05.312 | M06.871 | M06.072 |
| M05.279              | M05.832 | M05.252 | M05.631 | M05.362 | M06.041 | M06.331 |
| M05.661              | M06.032 | M05.369 | M05.652 | M05.629 | M06.069 | M05.159 |
| M05.671              | M06.052 | M05.372 | M06.08  | M05.172 | M05.331 | M05.469 |
| M05.571              | M06.062 | M06.859 | M06.09  | M05.511 | M05.662 | M05.831 |
| M06.212              | M05.19  | M05.621 | M05.259 | M05.432 | M05.439 | M06.839 |
| M06.29               | M05.839 | M05.529 | M05.162 | M05.452 | M05.742 | M05.339 |
| M05.649              | M06.371 | M06.011 | M05.451 | M06.321 | M06.20  | M05.612 |
| M06.221              | M05.012 | M06.279 | M05.749 | M06.362 | M06.322 | M05.179 |
| M06.872              | M05.639 | M05.361 | M05.759 | M05.212 | M05.322 | M05.872 |
| M05.161              | M05.519 | M05.659 | M05.79  | M06.079 | M05.152 | M06.211 |
| M05.741              | M05.539 | M05.719 | M05.061 | M05.232 | M05.70  | M05.30  |
| M06.369              | M05.89  | M06.251 | M06.232 | M05.271 | M05.849 | M05.522 |

|                 |         |         |         |         |         |         |
|-----------------|---------|---------|---------|---------|---------|---------|
| M05.521         | M06.229 | M06.80  | M06.28  | M05.672 | M06.841 | M05.472 |
| M05.9           | M06.39  | M05.29  | M06.819 | M05.131 | M06.861 | M06.021 |
| M06.339         | M05.121 | M05.561 | M05.219 | M05.512 | M05.111 | M06.269 |
| M05.311         | M05.531 | M05.771 | M05.39  | M05.722 | M06.029 | M05.169 |
| M05.319         | M06.359 | M06.061 | M05.141 | M06.262 | 714.81  | M05.562 |
| M06.4           | M06.852 | M06.89  | M05.732 | M05.151 | 714.2   | M06.231 |
| M06.012         | M05.541 | M05.019 | M05.822 | 357.1   | M05.579 | M05.049 |
| M06.022         | M06.851 | M05.072 | M06.352 | M05.712 | M05.769 | M05.852 |
| M05.231         | M05.032 | M05.869 | M06.862 | M05.721 | M05.851 | M06.049 |
| M05.241         | M05.619 | M06.88  | M06.869 | M05.842 | M05.039 | M06.249 |
| M05.112         | M05.40  | M05.341 | M05.641 | M06.071 | M05.332 | M06.829 |
| M05.551         | M05.812 | M05.149 | M05.69  | M06.239 | M05.10  | M05.022 |
| M05.449         | M05.069 | 714.0   | M05.542 | M06.342 | M05.142 | M05.239 |
| M06.051         | 714.1   | M05.819 | M05.412 | M06.351 | M05.461 | M06.311 |
| M06.832         | 359.6   | M05.862 | M06.252 | M05.261 | M06.031 | M06.38  |
| M05.042         | 714.89  | M05.021 | M05.00  | M05.60  | M05.351 | M06.831 |
| M05.352         | 714.9   | M06.019 | M05.262 | M05.821 | M05.49  | M05.171 |
| M05.669         | M05.572 | M06.219 | M05.479 | M06.00  | M05.762 | M05.559 |
| M06.1           | M05.751 | M06.241 | M06.059 | M06.319 | M05.349 | M06.329 |
| M05.861         | M06.242 | M06.312 | M05.632 | M06.379 | M05.359 | M05.041 |
| M05.879         | M06.30  | M06.349 | M05.119 | M06.842 | M05.419 | M05.329 |
| M05.031         | M06.332 | M06.9   | M06.361 | M05.249 | M05.421 | M05.471 |
| M05.371         | M06.811 | M05.079 | M05.052 | M05.342 | M05.761 | M05.80  |
| M05.549         | M05.051 | M05.222 | M05.059 | M05.50  | M05.772 | M05.379 |
| M05.462         | M05.20  | M05.622 | M05.729 | M06.039 | M05.321 | M05.422 |
| M05.229         | M05.251 | M05.411 | M05.811 | M06.812 | M05.739 | M06.372 |
| M05.441         | M05.552 | M05.442 | M06.879 | M06.821 | M05.841 | M05.011 |
| M06.261         | M05.731 | M05.859 | M05.221 | M05.611 | M06.222 | M05.129 |
| M06.271         | M05.752 | M06.341 | M05.242 | M05.651 | M05.642 | M05.139 |
| M05.062         | M05.779 | M06.822 | M05.269 | M05.122 | M05.132 | M05.569 |
|                 |         |         |         |         |         |         |
| Viral Hepatitis |         |         |         |         |         |         |
| O98.413         | 070.9   | 711.90  | K72.00  | B16.2   | 070.59  | 583.81  |
| B18.9           | 357.1   | 711.60  | B17.0   | B19.0   | 357.3   | 711.80  |
| K74.69          | B16.1   | 582.81  | B18.0   | B17.2   | 070.43  | 070.22  |
| B17.9           | B18.1   | O98.411 | B20     | B16.9   | 070.49  | 070.31  |
| 581.81          | B19.9   | B19.11  | B19.20  | B19.10  | B18.2   | 070.53  |
| 070.42          | 070.21  | K74.60  | 070.0   | O98.419 | Z00.5   | G63     |
| 711.50          | 070.20  | B17.8   | 070.6   | 580.81  | 070.23  | O98.412 |
| 042             | 647.60  | M01.X0  | 070.33  | 647.61  | 647.63  | N08     |
| 570             | V70.8   | B17.10  | 711.70  | 357.4   | 070.32  | B16.0   |
| B18.8           | B19.21  | 070.70  | 571.5   | 070.1   | 070.44  | 070.52  |
| B17.11          | B15.0   | 070.41  | 070.71  | 711.40  | 070.54  | 070.30  |

|       |        |    |    |    |    |    |
|-------|--------|----|----|----|----|----|
| B15.9 | 070.51 | .. | .. | .. | .. | .. |
|-------|--------|----|----|----|----|----|

**eTable 3.** Primary and Secondary Outcomes in an Unmatched Cohort of Patients Receiving Subcutaneous Monoclonal Antibody Treatment and an At-Risk Population of Patients Not Receiving Monoclonal Antibody Treatment

| 28-Day Event Rate Outcomes             | No. Events, Event Rate (%) |             | Risk Ratio (RR) Estimates |                              |             |         |                 |             |         |
|----------------------------------------|----------------------------|-------------|---------------------------|------------------------------|-------------|---------|-----------------|-------------|---------|
|                                        | Treated                    | Non-treated | Unadj.                    | Adjusted by Propensity Score |             |         | Adjusted by IPW |             |         |
| Casirivimab + Imdevimab and Nontreated | (n=665)                    | (n=3821)    | RR                        | RR                           | (95% CI)    | p-value | RR              | (95% CI)    | p-value |
| Hospitalization or death               | 23 (3.5)                   | 251 (6.6)   | 0.5                       | 0.4                          | (0.3 – 0.7) | <.001   | 0.5             | (0.4 – 0.6) | <.001   |
| Hospitalization                        | 23 (3.5)                   | 208 (5.4)   | 0.6                       | 0.5                          | (0.4 – 0.8) | .004    | 0.6             | (0.5 – 0.7) | <.001   |
| Death                                  | 1 (0.2)                    | 80 (2.1)    | 0.1                       | 0.1                          | (0.0 – 0.4) | .004    | 0.1             | (0.0 – 0.1) | <.001   |
| ED admission or hospitalization        | 40 (6.0)                   | 376 (9.8)   | 0.6                       | 0.6                          | (0.4 – 0.8) | <.001   | 0.6             | (0.5 – 0.7) | <.001   |

Abbreviations: Unadj, unadjusted; IPW, Inverse Probability Weigh; CI, confidence interval; ED, emergency department.



**eTable 4.** Comparison of Characteristics in Subcutaneous mAb Treated Group and Nontreated Control Group

| Characteristic                                     | Unmatched   |             |         | Matched     |             |         |
|----------------------------------------------------|-------------|-------------|---------|-------------|-------------|---------|
|                                                    | Treated     | Nontreated  | p-value | Treated     | Nontreated  | p-value |
|                                                    | (N=969)     | (N=4353)    |         | (N=652)     | (N=1304)    |         |
| Age, mean (SD)                                     | 53.8 (16.7) | 49.7 (21.5) | <.001   | 53.7 (16.9) | 53.0 (19.3) | .44     |
| Female gender, No. (%)                             | 547 (56.4)  | 2542 (58.4) | .27     | 388 (59.5)  | 785 (60.2)  | .77     |
| Black race, No. (%)                                | 49 (5.2)    | 407 (9.5)   | <.001   | 35 (5.4)    | 50 (3.8)    | .12     |
| Corticosteroids as a home medication, No. (%)      | 240 (35.9)  | 1190 (30.9) | .01     | 231 (35.4)  | 448 (34.4)  | .64     |
| History of rheumatoid arthritis, No. (%)           | 24 (3.6)    | 62 (1.6)    | <.001   | 20 (3.1)    | 30 (2.3)    | .31     |
| History of asthma, No. (%)                         | 220 (32.9)  | 1395 (36.2) | .10     | 213 (32.7)  | 387 (29.7)  | .18     |
| History of obstructive sleep apnea, No. (%)        | 128 (19.2)  | 507 (13.2)  | <.001   | 123 (18.9)  | 212 (16.3)  | .15     |
| History of hypertension, No. (%)                   | 314 (47.0)  | 1422 (36.9) | <.001   | 303 (46.5)  | 591 (45.3)  | .63     |
| History of COPD, No. (%)                           | 115 (17.2)  | 566 (14.7)  | .09     | 108 (16.6)  | 202 (15.5)  | .54     |
| History of diabetes, No. (%)                       | 112 (16.8)  | 559 (14.5)  | .13     | 107 (16.4)  | 203 (15.6)  | .63     |
| History of solid organ or cell transplant, No. (%) | 10 (1.5)    | 6 (0.2)     | <.001   | 1 (0.2)     | 2 (0.2)     | 1.0     |
| <b>Variables Not Included in Propensity Score</b>  | --          | --          | --      | --          | --          | --      |
| History of smoking, No. (%)                        | 227 (34.0)  | 777 (28.7)  | .008    | 221 (33.9)  | 305 (33.5)  | .88     |
| Body mass index, mean (SD)                         | 31.8 (7.5)  | 31.6 (7.7)  | .47     | 32.0 (7.6)  | 32.1 (7.7)  | .92     |
| History of dyspnea, No. (%)                        | 40 (6.0)    | 200 (5.2)   | .40     | 40 (6.1)    | 75 (5.7)    | .52     |
| History of pulmonary hypertension, No. (%)         | 13 (1.9)    | 56 (1.4)    | .34     | 11 (1.7)    | 21 (1.6)    | .90     |
| History of atrial fibrillation, No. (%)            | 33 (4.9)    | 167 (4.3)   | .48     | 32 (4.9)    | 62 (4.7)    | .88     |
| History of valvular heart disease, No. (%)         | 31 (4.6)    | 178 (4.6)   | .98     | 30 (4.6)    | 71 (5.4)    | .43     |
| History of coronary artery disease, No. (%)        | 73 (10.9)   | 320 (8.3)   | .03     | 71 (10.9)   | 142 (10.9)  | 1.0     |
| History of stroke, No. (%)                         | 35 (5.2)    | 185 (4.8)   | .63     | 33 (5.1)    | 84 (6.4)    | .22     |
| History of congestive heart failure, No. (%)       | 36 (5.4)    | 221 (5.7)   | .72     | 32 (4.9)    | 85 (6.5)    | .16     |
| History of chronic kidney disease, No. (%)         | 34 (5.1)    | 185 (4.8)   | .75     | 27 (4.1)    | 80 (6.1)    | .07     |
| History of fatty liver disease, No. (%)            | 28 (4.2)    | 106 (2.8)   | .04     | 28 (4.3)    | 42 (3.2)    | .23     |
| History of cancer, No. (%)                         | 70 (10.5)   | 310 (8.0)   | .04     | 69 (10.6)   | 133 (10.2)  | .79     |
| History of chemotherapy, No. (%)                   | 31 (4.6)    | 113 (2.9)   | .02     | 28 (4.3)    | 37 (2.8)    | .09     |

|                                             |            |             |       |            |            |     |
|---------------------------------------------|------------|-------------|-------|------------|------------|-----|
| History of allergic rhinitis, No. (%)       | 78 (11.7)  | 517 (13.4)  | .22   | 77 (11.8)  | 172 (13.2) | .39 |
| History of viral hepatitis, No. (%)         | 12 (1.8)   | 44 (1.1)    | .16   | 11 (1.7)   | 19 (1.5)   | .70 |
| ACE Inhibitors, No. (%)                     | 118 (17.7) | 525 (13.6)  | .006  | 118 (18.1) | 201 (15.4) | .13 |
| Angiotensin II receptor blocker, No. (%)    | 69 (10.3)  | 316 (8.2)   | .07   | 67 (10.3)  | 152 (11.7) | .36 |
| Alpha blocker, No. (%)                      | 9 (1.3)    | 44 (1.1)    | .65   | 9 (1.4)    | 16 (1.2)   | .78 |
| Beta blockers, No. (%)                      | 166 (24.8) | 708 (18.4)  | <.001 | 158 (24.2) | 272 (20.9) | .09 |
| Statins, No. (%)                            | 223 (33.4) | 1018 (26.4) | <.001 | 216 (33.1) | 425 (32.6) | .81 |
| Antidepressants, No. (%)                    | 200 (29.9) | 1115 (28.9) | .60   | 194 (29.7) | 414 (31.7) | .37 |
| Charlson Comorbidity Index Score, mean (SD) | 0.8 (1.4)  | 0.7 (1.3)   | .03   | 0.8 (1.4)  | 0.8 (1.4)  | .96 |

Abbreviations: SD, standard deviation; COPD, chronic obstructive pulmonary disease; ACE, angiotensin -converting enzyme.

**eTable 5. 28-Day Hospitalization Outcomes by Route of mAb Administration**

| Outcome                                           | Subcutaneous<br>No. (%) | Intravenous<br>No. (%) | Absolute Risk<br>Difference (%) |      |             |
|---------------------------------------------------|-------------------------|------------------------|---------------------------------|------|-------------|
|                                                   |                         |                        | Unadj.                          | Adj. | 95% CI      |
| <b>All Infused Patients<sup>a</sup></b>           | <b>(n=969)</b>          | <b>(n=1216)</b>        |                                 |      |             |
| Hospitalization                                   | 27 (2.8)                | 20 (1.6)               | 1.1                             | 1.5  | -0.3 to 3.4 |
| ICU admission                                     | 3 (0.3)                 | 3 (0.2)                | 0.1                             | 0.7  | -3.5 to 5.0 |
| Ventilation                                       | 3 (0.3)                 | 2 (0.2)                | 0.1                             | 0.2  | -5.8 to 5.5 |
|                                                   | <b>(n=27)</b>           | <b>(n=20)</b>          | <b>Wilcoxon p-value</b>         |      |             |
| LOS of hospitalizations,<br>med, (IQR)            | 4 (2,8)                 | 3 (4, 6.5)             | 0.70                            |      |             |
| <b>Same Site Infused<br/>Patients<sup>b</sup></b> | <b>(n=721)</b>          | <b>(n=441)</b>         |                                 |      |             |
| Hospitalization                                   | 17 (2.4)                | 4 (0.9)                | 1.5                             | 1.5  | -0.4 to 3.7 |
| ICU admission                                     | 3 (0.4)                 | 1 (0.2)                | 0.2                             | 0.2  | -5.9 to 6.3 |
| Ventilation                                       | 2 (0.3)                 | 1 (0.2)                | 0.1                             | 0.0  | -8.7 to 8.6 |
|                                                   | <b>(n=17)</b>           | <b>(n=4)</b>           | <b>Wilcoxon p-value</b>         |      |             |
| LOS of hospitalizations,<br>med, (IQR)            | 6 (3,10)                | 4.5 (2, 6)             | 0.42                            |      |             |

Abbreviations: mAb, monoclonal antibodies; Unadj, unadjusted; Adj, adjusted; CI, confidence interval; ICU, intensive care unit; LOS, length of stay; med, median; IQR, interquartile range.

<sup>a</sup>Patients treated at all health system facilities; SQ patients were treated from July 20 – September 20, 2021; IV patients were treated from July 15- September 29, 2021.

<sup>b</sup>Patients treated at the same UPMC facilities; SQ patients were treated from September 9-29, 2021; IV patients were treated from July 15- September 29, 2021. Adj: Model adjusted for age, gender, and vaccination status.

**eFigure 1.** Distribution of Propensity Scores (X 100) Before and After Matching of Treated and Not Treated Patients

The shaded rectangles depict the interquartile range; the lower and upper ends of the vertical lines depict the 5<sup>th</sup> and 95<sup>th</sup> percentiles. P-values are from Wilcoxon tests.

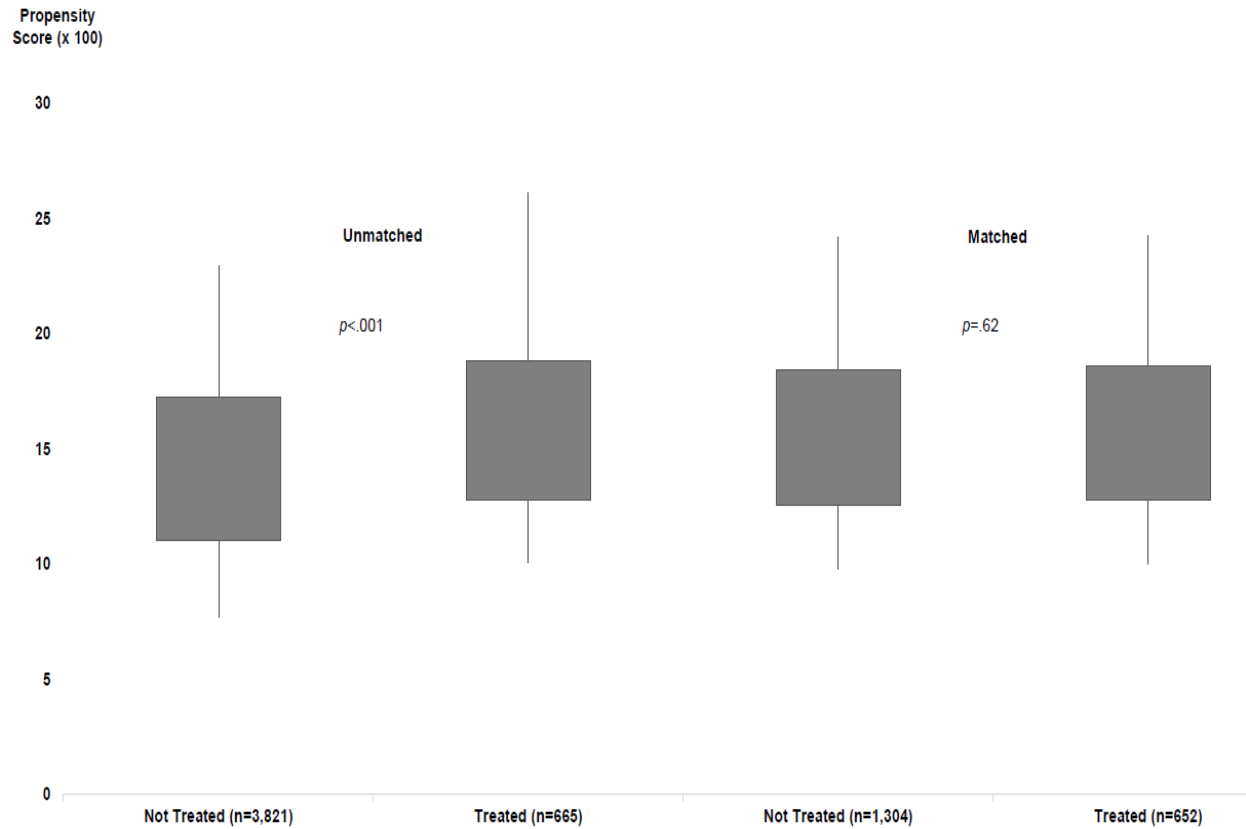

**eFigure 2.** Plot of Cumulative Event Rates of Hospitalization/Death by Day of Follow-up (X-Axis) for Matched Treated (Solid Line) and Not Treated (Dashed Line) Patients

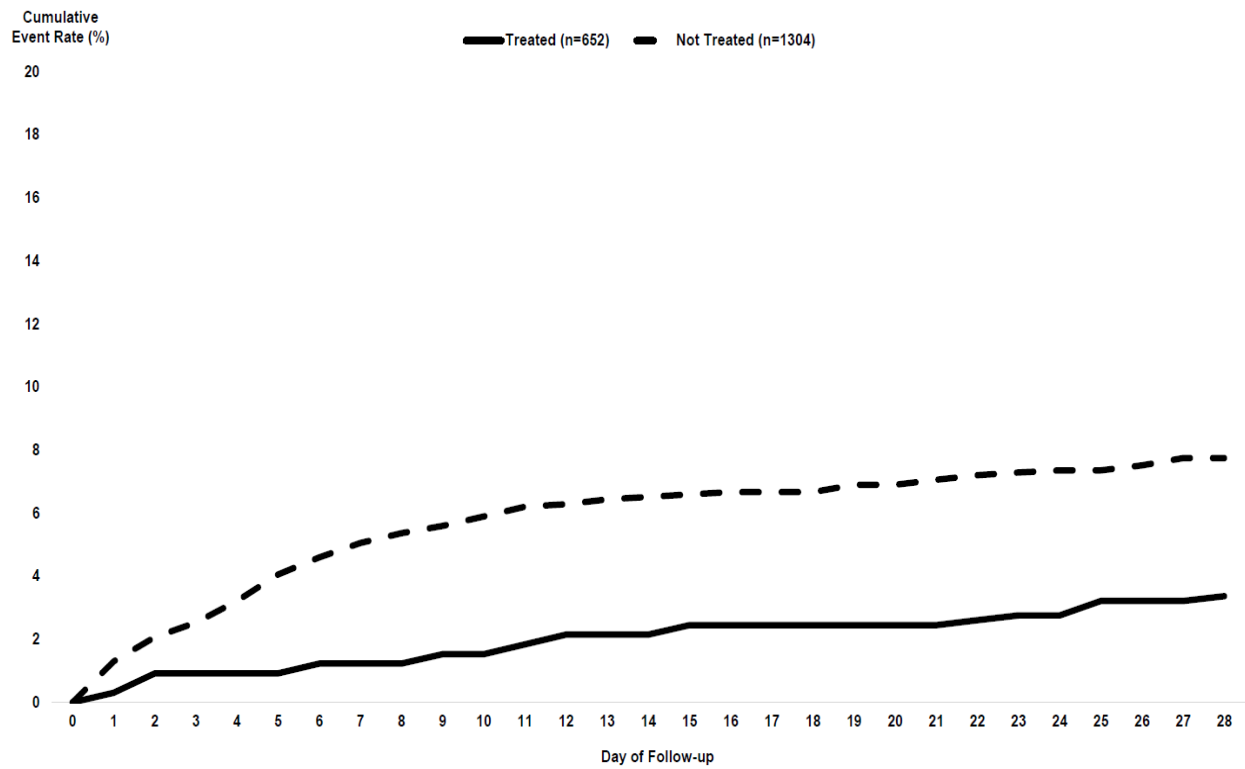

Supplement: jamanetwopen-e226920-s001.pdf [file jamanetwopen-e226920-s001.pdf]
